# Supplementary material for: BCL2L10 positive cells in bone marrow are an independent prognostic factor of azacitidine outcome in myelodysplastic syndrome and acute myeloid leukemia
Source: PubMed Central journal article supplement (PMC5564547; doi:10.18632/oncotarget.17482), 2017-04-27
Supplement: oncotarget-08-47103-s001.pdf [file oncotarget-08-47103-s001.pdf]

# BCL2L10 positive cells in bone marrow are an independent prognostic factor of azacitidine outcome in myelodysplastic syndrome and acute myeloid leukemia

## Supplementary Materials

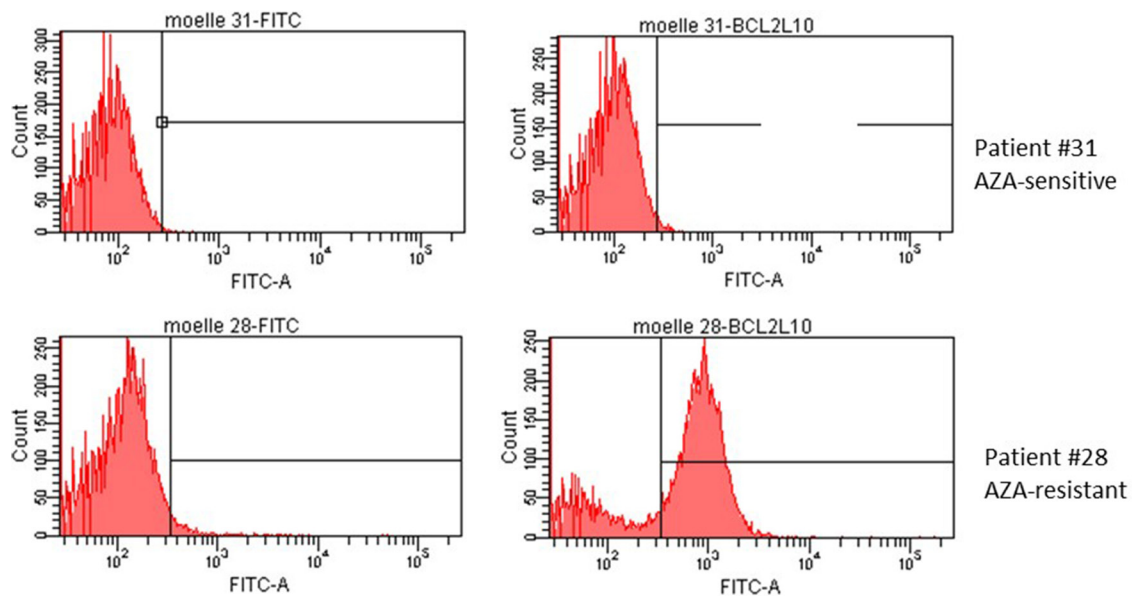

Supplementary Figure 1: Examples of BCL2L10 quantification by flow cytometry in AZA sensitive and resistant patients.

**Supplementary Table 1: Characteristics of population depending on BCL2L10 percentage before AZA onset**

|                                       | BCL2L10<br>before AZA onset |       | <i>p</i> -value     |
|---------------------------------------|-----------------------------|-------|---------------------|
|                                       | < 10%                       | ≥ 10% |                     |
| <b>WHO classification (%)</b>         |                             |       | 0.07                |
| RA/RCMD                               | 44                          | 21    |                     |
| RAEB-1                                | 16                          | 5     |                     |
| RAEB-2                                | 20                          | 26    |                     |
| AML                                   | 20                          | 48    |                     |
| <b>Response (%)</b>                   |                             |       | 0.08                |
| CR                                    | 14                          | 0     | < 0.0001 for CR/mCR |
| m-CR                                  | 36                          | 0     |                     |
| PR                                    | 0                           | 20    |                     |
| HI                                    | 21                          | 0     |                     |
| SD                                    | 29                          | 20    |                     |
| Progression                           | 0                           | 60    |                     |
| <b>IPSS (MDS and AML ≤ 30%) (%)</b>   |                             |       | 0.01                |
| Low                                   | 8                           | 13    |                     |
| Int-1                                 | 56                          | 7     |                     |
| Int-2                                 | 17                          | 40    |                     |
| High                                  | 19                          | 40    |                     |
| <b>IPSS-R (MDS and AML ≤ 30%) (%)</b> |                             |       | 0.25                |
| Very low                              | 7                           | 0     |                     |
| Low                                   | 5                           | 6     |                     |
| Intermediate                          | 37                          | 11    |                     |
| High                                  | 12                          | 22    |                     |
| Very high                             | 39                          | 61    |                     |
